# Supplementary material for: An InIII-based anionic metal–organic framework: sensitization of lanthanide (III) ions and selective absorption and separation of cationic dyes
Source: Royal Society of Chemistry journal article supplement (doi:10.1039/c5ta00986c), 2015-01-01
Supplement: c5ta00986c1.pdf [file c5ta00986c1.pdf]

## Supporting information

### **An In<sup>III</sup>-based Anionic Metal–Organic Framework: Sensitization of Lanthanide (III) Ions and Selective Absorption and Separation of Cationic Dyes**

*Lin Liu,<sup>a</sup> Xiao-Nan Zhang,<sup>a</sup> Zheng-bo Han,<sup>a\*</sup> Ming-Liang Gao,<sup>a</sup> Xiao-Man Cao,<sup>a</sup> and Shi-Ming Wang,<sup>b\*</sup>*

<sup>a</sup> College of Chemistry, Liaoning University, Shenyang 110036 P. R. China E-mail: ceshzb@lnu.edu.cn (Z.-B. Han)

<sup>b</sup> College of Light Industry, Liaoning University, Shenyang 110036 P. R. China E-mail: wangsm383@163.com (S.-M. Wang)

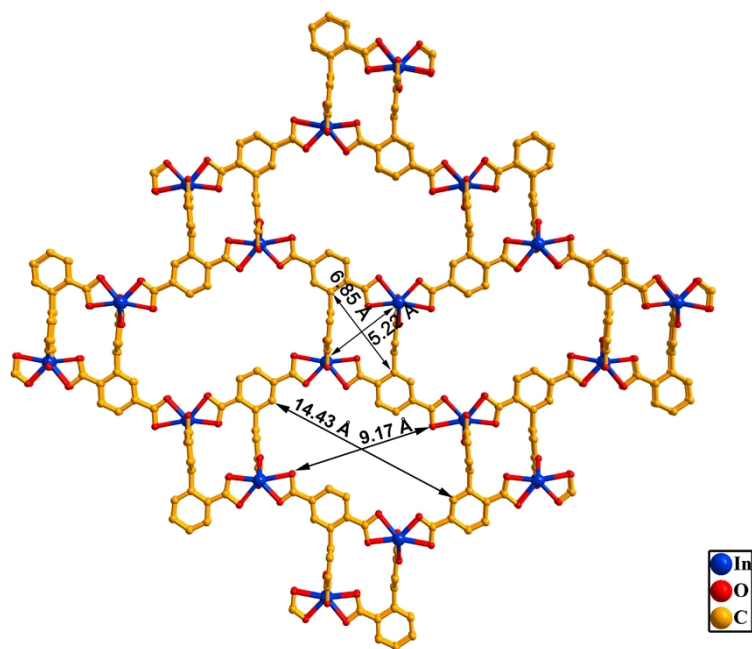

Fig. S1 The size of the channel for In<sup>III</sup>-MOF.

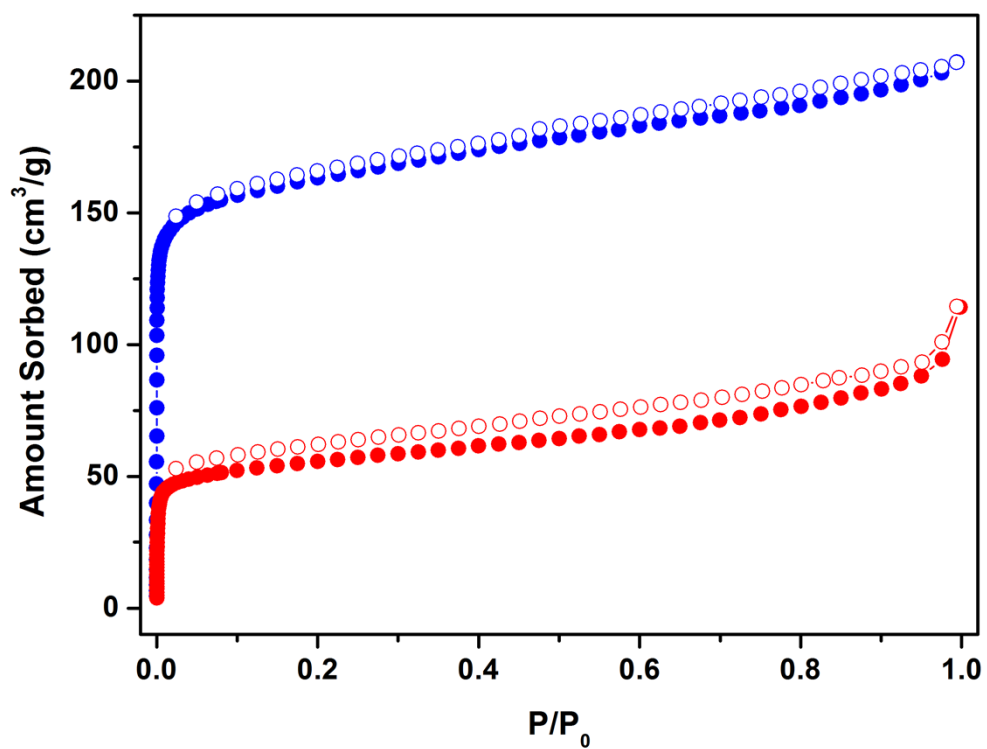

Fig. S2 Ar Adsorption-desorption isotherm for In<sup>III</sup>-MOF (red) and In<sup>III</sup>-MOF-Li<sup>+</sup> (blue) at 87 K.

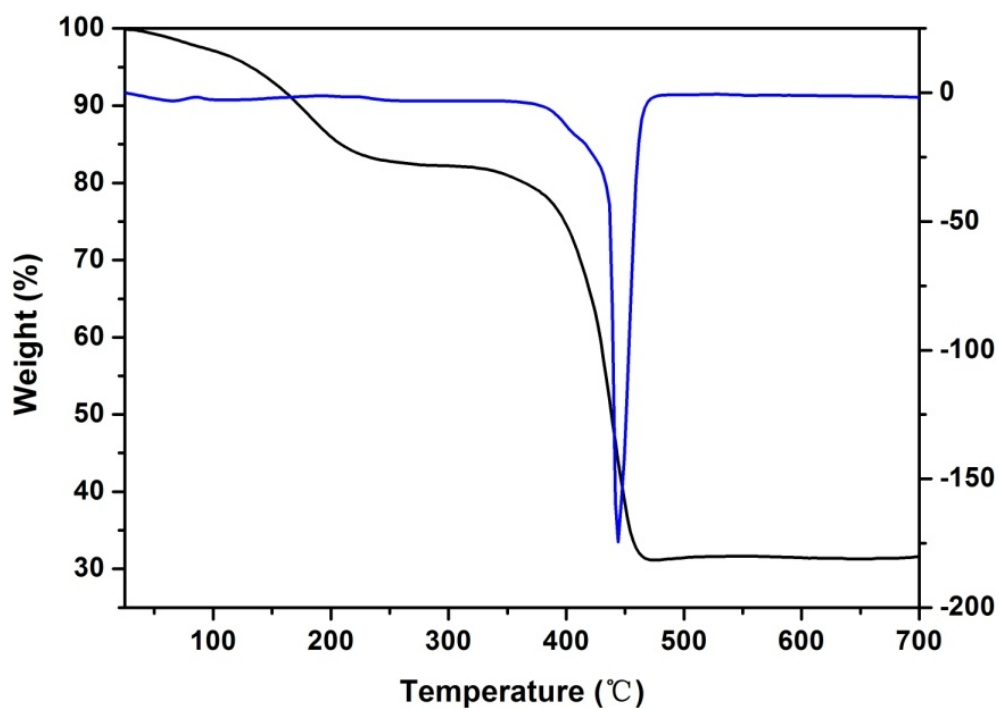

**Fig. S3** The thermal stability of In<sup>III</sup>-MOF was examined by thermogravimetric analysis (TGA) in the temperature range of 25–700 °C with a heating rate of 5 °C min<sup>-1</sup> under a N<sub>2</sub> atmosphere.

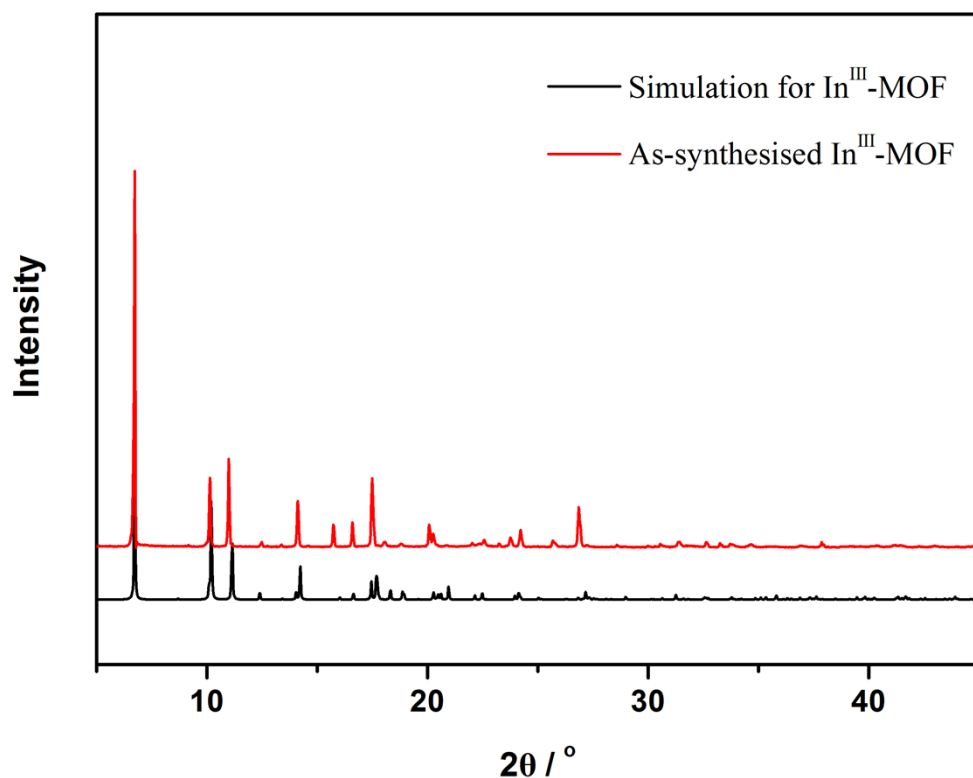

**Fig. S4** Powder XRD patterns for simulated and as-synthesized In<sup>III</sup>-MOF.

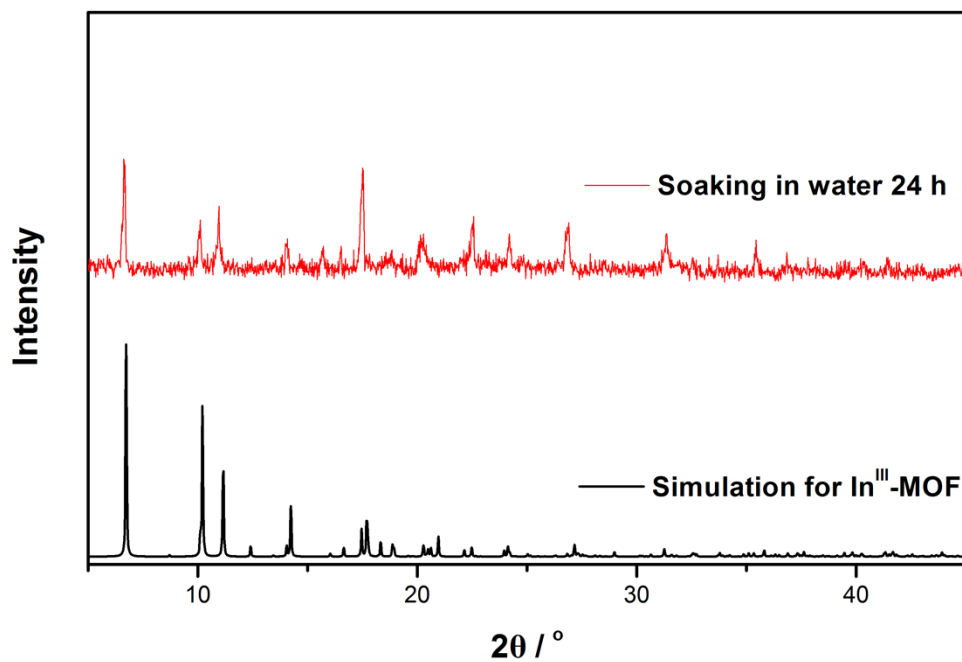

**Fig. S5** Powder XRD patterns for simulated and as-synthesized  $\text{In}^{\text{III}}$ -MOF after soaking in water at room temperature.

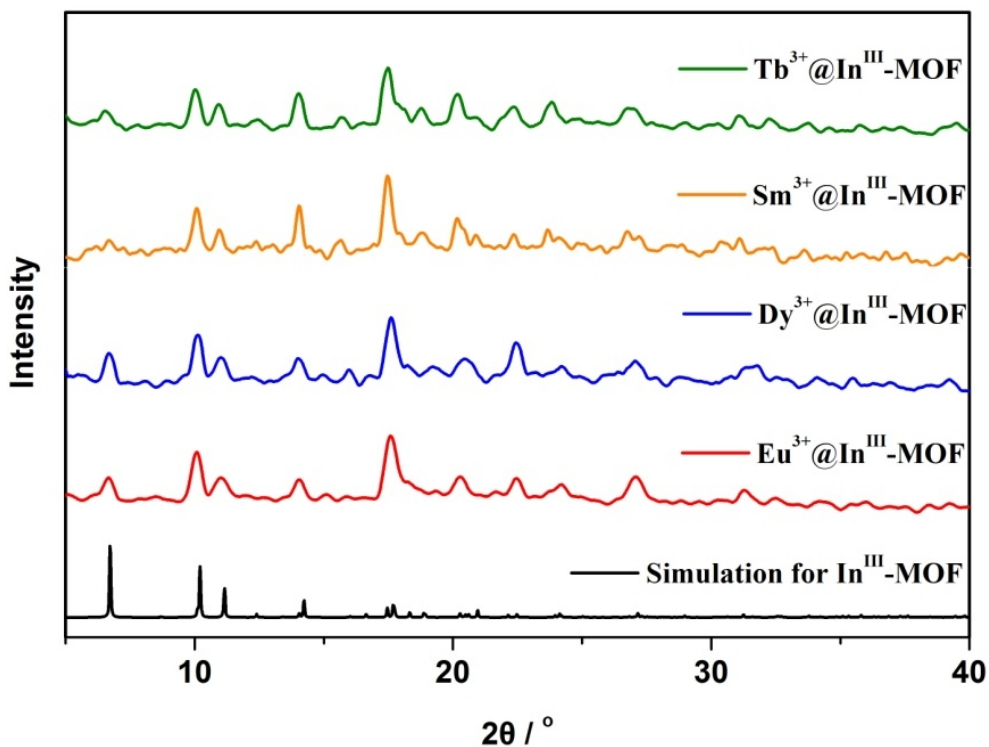

**Fig. S6** Powder XRD patterns for simulated  $\text{In}^{\text{III}}$ -MOF and as-synthesized  $\text{Ln}^{3+}@\text{In}^{\text{III}}$ -MOF ( $\text{Ln}^{3+} = \text{Eu}^{3+}$ ,  $\text{Dy}^{3+}$ ,  $\text{Sm}^{3+}$ , and  $\text{Tb}^{3+}$ ), respectively.

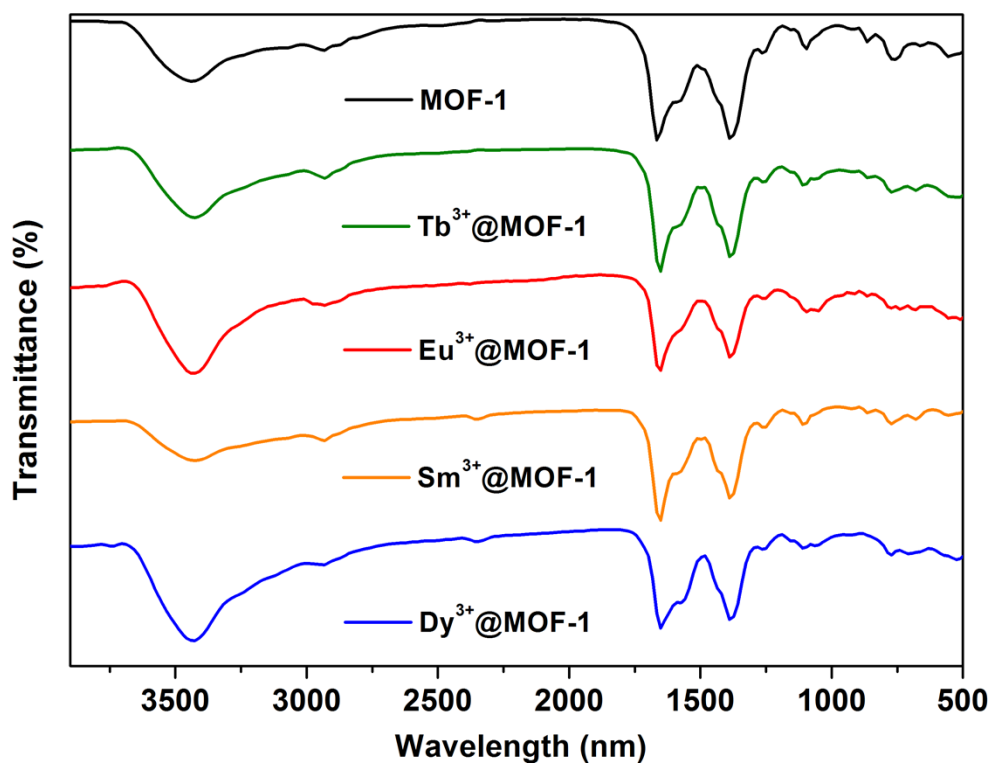

**Fig. S7** IR spectra of the as-synthesized In<sup>III</sup>-MOF, Tb<sup>3+</sup>@In<sup>III</sup>-MOF, Eu<sup>3+</sup>@In<sup>III</sup>-MOF, Sm<sup>3+</sup>@In<sup>III</sup>-MOF, and Dy<sup>3+</sup>@In<sup>III</sup>-MOF.

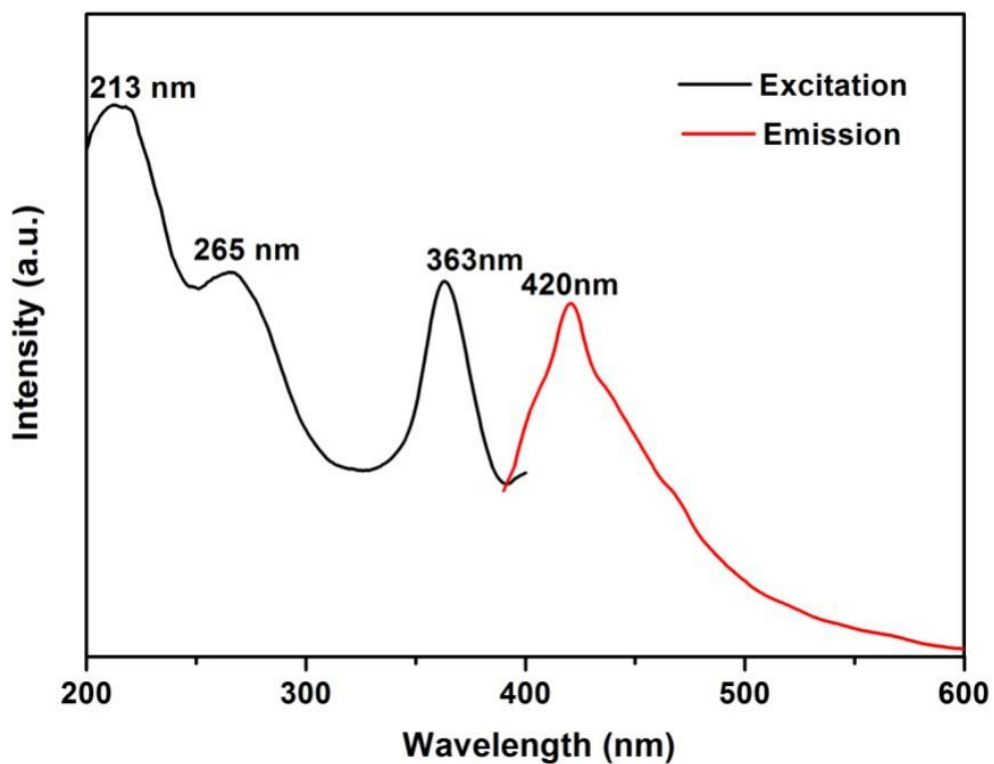

**Fig. S8** Excitation and emission spectra of the H<sub>4</sub>L ligand.

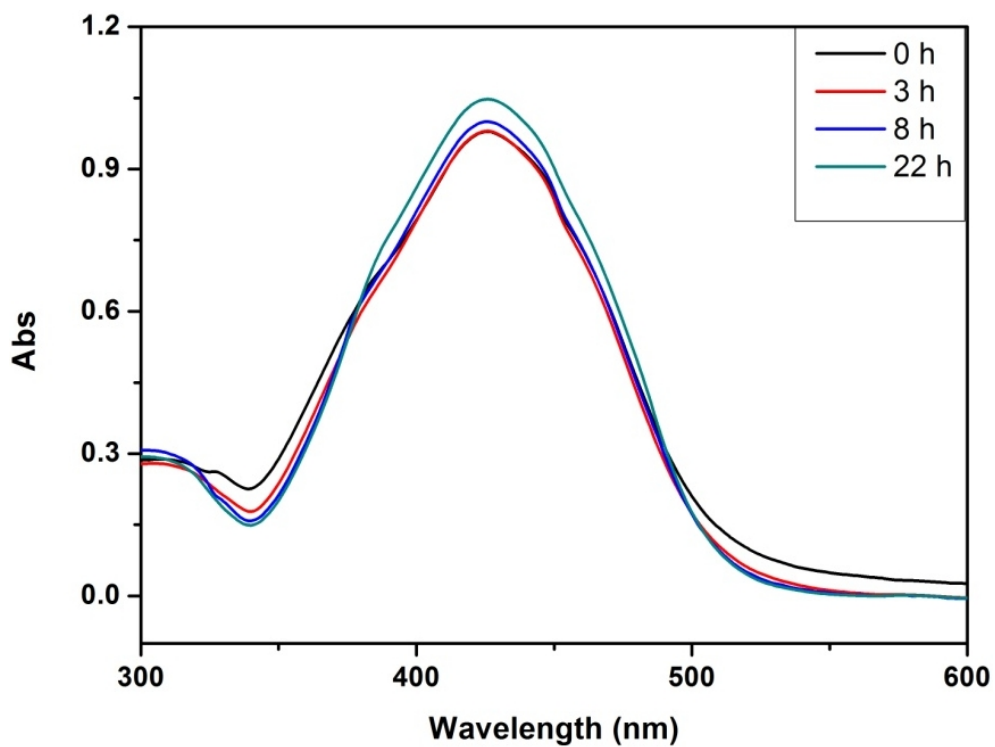

Fig. S9 UV-vis spectra of DMF solution of  $\text{MO}^-$  in the presence of  $\text{In}^{\text{III}}$ -MOF.

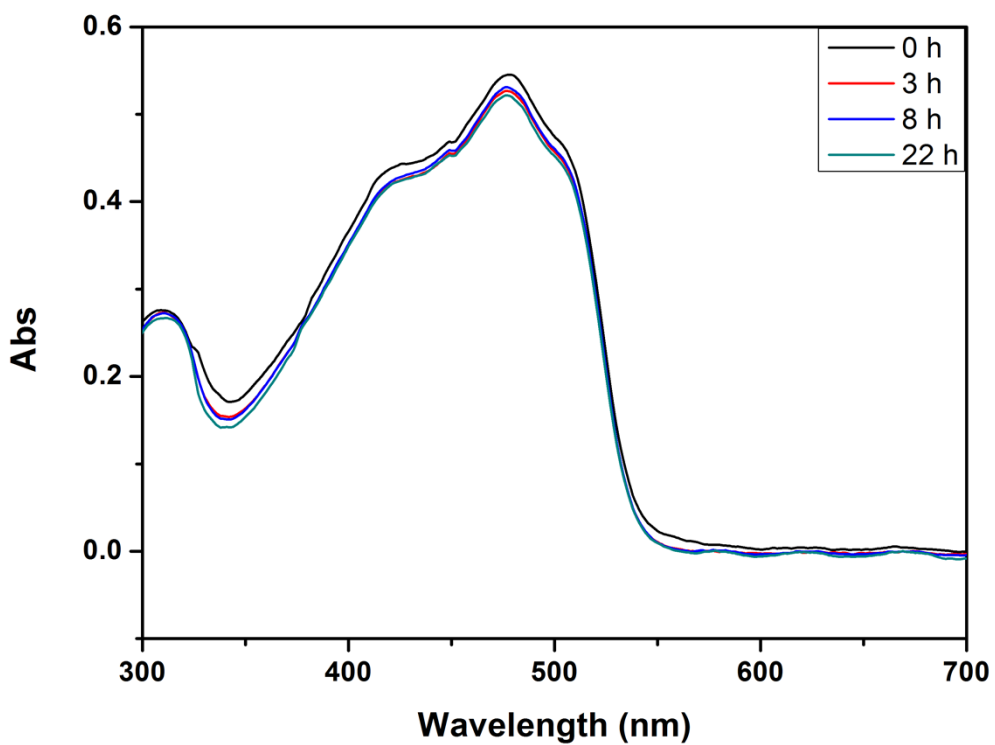

Fig. S10 UV-vis spectra of DMF solution of  $\text{SD}^0$  in the presence of  $\text{In}^{\text{III}}$ -MOF.

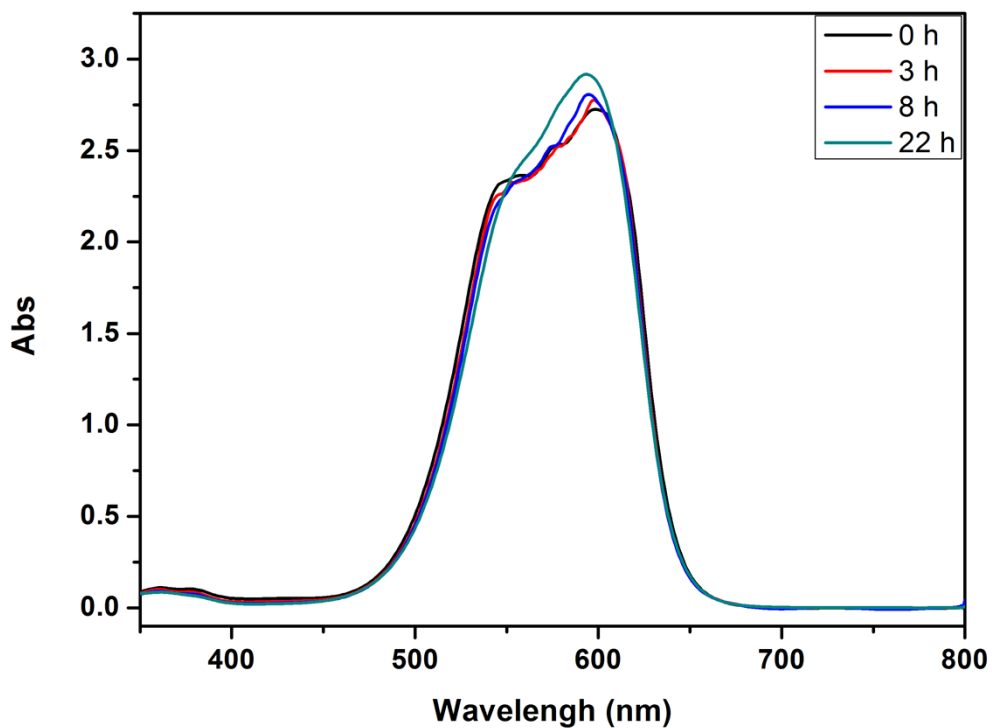

Fig. S11 UV-vis spectra of DMF solutions of CV<sup>+</sup> in the presence of In<sup>III</sup>-MOF.

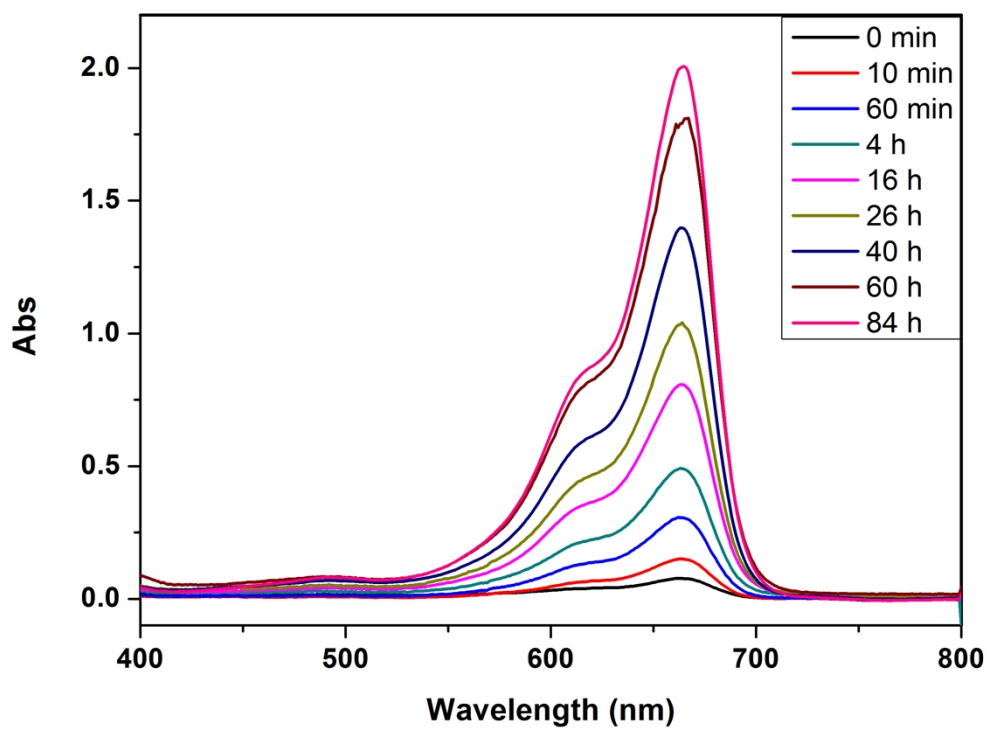

Fig. S12 UV-vis spectra of MB<sup>+</sup> release from MB<sup>+</sup>@In<sup>III</sup>-MOF in the DMF solution.

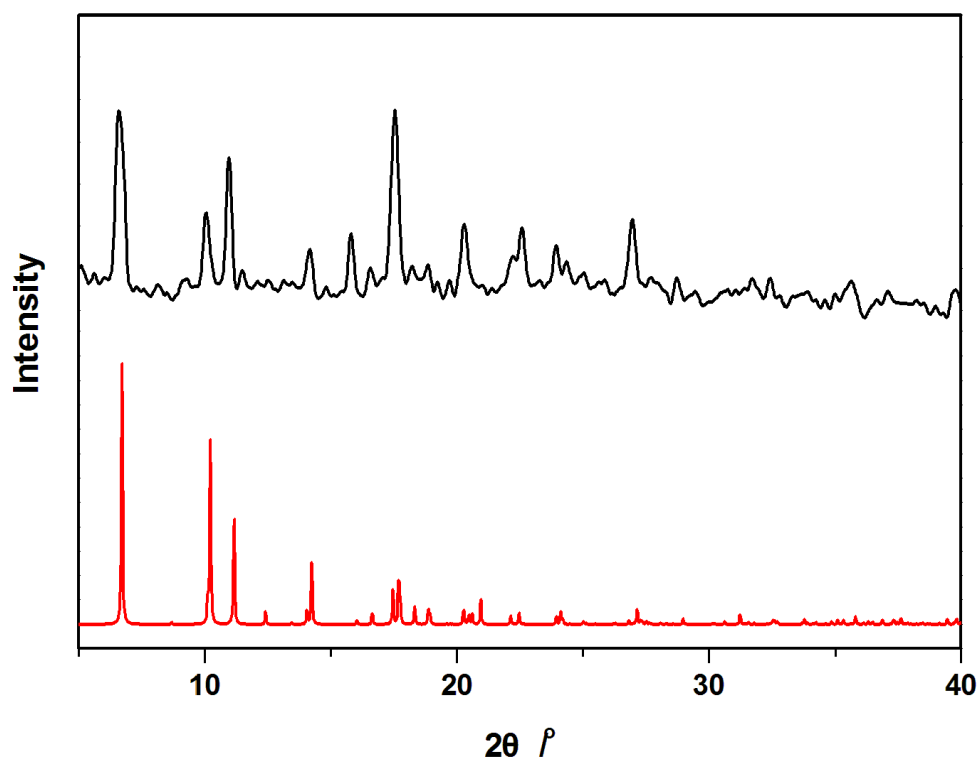

**Fig. S13** Powder XRD patterns for simulated  $\text{In}^{\text{III}}\text{-MOF}$  and  $\text{MB}^+\text{@In}^{\text{III}}\text{-MOF}$  after  $\text{MB}^+$  release.



**Table S1** Crystal data and structure refinement for **In<sup>III</sup>-MOF**

|                                   |                                                   |         |
|-----------------------------------|---------------------------------------------------|---------|
| Empirical formula                 | C <sub>16</sub> H <sub>6</sub> InO <sub>8</sub>   |         |
| Formula weight                    | 441.03                                            |         |
| Temperature                       | 293(2) K                                          |         |
| Wavelength                        | 0.71073 Å                                         |         |
| Crystal system                    | Orthorhombic                                      |         |
| Space group                       | Pnma                                              |         |
| Unit cell dimensions              | a = 20.305(5) Å                                   | α = 90° |
|                                   | b = 10.022(3) Å                                   | β = 90° |
|                                   | c = 17.220(5) Å                                   | γ = 90° |
| Volume                            | 3504.2(17) Å <sup>3</sup>                         |         |
| Z                                 | 4                                                 |         |
| Density (calculated)              | 0.836 Mg/m <sup>3</sup>                           |         |
| Absorption coefficient            | 0.694 mm <sup>-1</sup>                            |         |
| F(000)                            | 860                                               |         |
| Theta range for data collection   | 1.55 to 25.00°                                    |         |
| Index ranges                      | -21 ≤ h ≤ 23, -11 ≤ k ≤ 4, -18 ≤ l ≤ 20           |         |
| Reflections collected             | 12093                                             |         |
| Independent reflections           | 3132 [R(int) = 0.0663]                            |         |
| Completeness to theta = 25.00°    | 95.6 %                                            |         |
| Absorption correction             | Semi-empirical from equivalents                   |         |
| Max. and min. transmission        | 0.8359 and 0.7843                                 |         |
| Refinement method                 | Full-matrix least-squares on F <sup>2</sup>       |         |
| Data / restraints / parameters    | 3132 / 0 / 116                                    |         |
| Goodness-of-fit on F <sup>2</sup> | 0.976                                             |         |
| Final R indices [I > 2σ(I)]       | R <sub>1</sub> = 0.0701, wR <sub>2</sub> = 0.1785 |         |
| R indices (all data)              | R <sub>1</sub> = 0.0934, wR <sub>2</sub> = 0.1876 |         |
| Largest diff. peak and hole       | 1.569 and -2.694 e.Å <sup>-3</sup>                |         |

$$^a R_1 = \frac{\sum ||F_o| - |F_c||}{\sum |F_o|}; wR_2 = \frac{\sum [w(F_o^2 - F_c^2)^2]}{\sum [w(F_o^2)^2]}^{1/2}$$

**Table S2** The ICP data for Ln<sup>3+</sup> and In<sup>3+</sup> ions in Ln<sup>3+</sup>@In<sup>III</sup>-MOF

|                                          | Elemental Concentration (ppm) |                  | The molar ratio<br>of In <sup>3+</sup> :Ln <sup>3+</sup> |   |
|------------------------------------------|-------------------------------|------------------|----------------------------------------------------------|---|
|                                          | In <sup>3+</sup>              | Ln <sup>3+</sup> |                                                          |   |
| Tb <sup>3+</sup> @In <sup>III</sup> -MOF | 12.4413                       | 4.18459          | 2.97                                                     | 1 |
| Eu <sup>3+</sup> @In <sup>III</sup> -MOF | 12.4261                       | 4.04375          | 3.07                                                     | 1 |
| Sm <sup>3+</sup> @In <sup>III</sup> -MOF | 12.6481                       | 3.98411          | 3.17                                                     | 1 |
| Dy <sup>3+</sup> @In <sup>III</sup> -MOF | 12.5492                       | 3.87249          | 3.24                                                     | 1 |
